# Supplementary material
Source: PubMed Central journal article supplement (PMC4690846)
Supplement: NIHMS732237-supplement.pdf [file NIHMS732237-supplement.pdf]

## SUPPLEMENTAL FIGURES AND LEGENDS

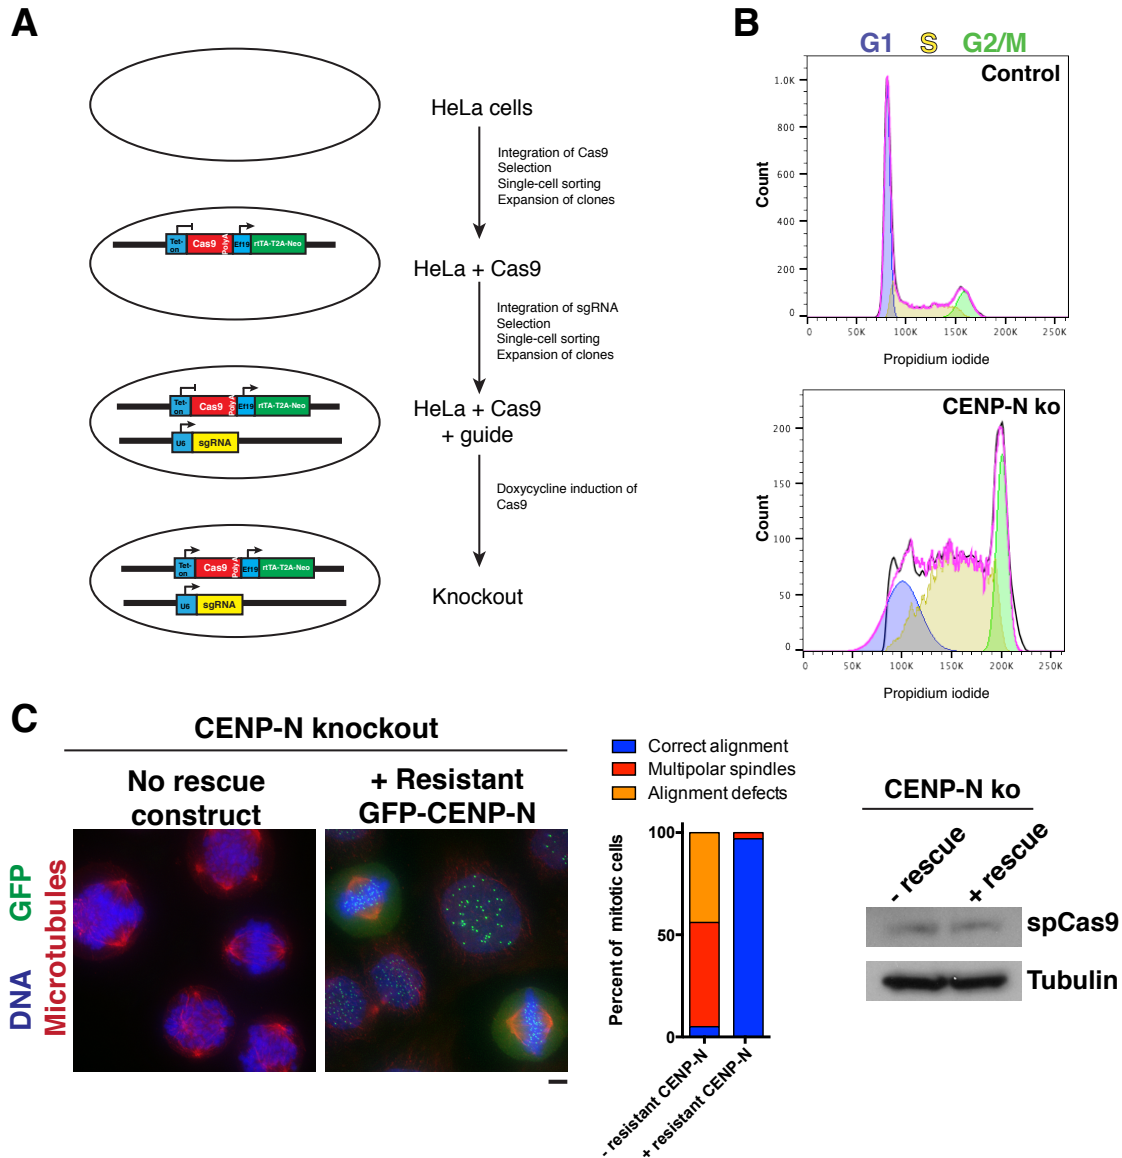

**Figure S1. Generation of on-target inducible knockouts.** Related to Figure 1. A) Flowchart for the generation of inducible knockouts using the CRISPR/Cas9 strategy. B) Representative analysis of DNA content of control cells (top) and CENP-N knockout cells (bottom) analyzed by flow cytometry after four days of Cas9 induction. Experimental data are shown in magenta, with G1/S/G2 populations that best fit the data based on the Watson Pragmatic model shown in blue, yellow and green. C) Rescue of the inducible CENP-N knockout by exogenous expression of GFP-CENP-N containing a mutated sgRNA targeting site. Left: immunofluorescence images of inducible CENP-N knockout cells, with or without the resistant CENP-N construct, induced for four days. Middle: quantification of mitotic phenotypes following four-day induction of the CENP-N knockout. Right: Western blot showing equivalent induction of spCas9 in both cell lines. Scale bar, 5  $\mu$ m.

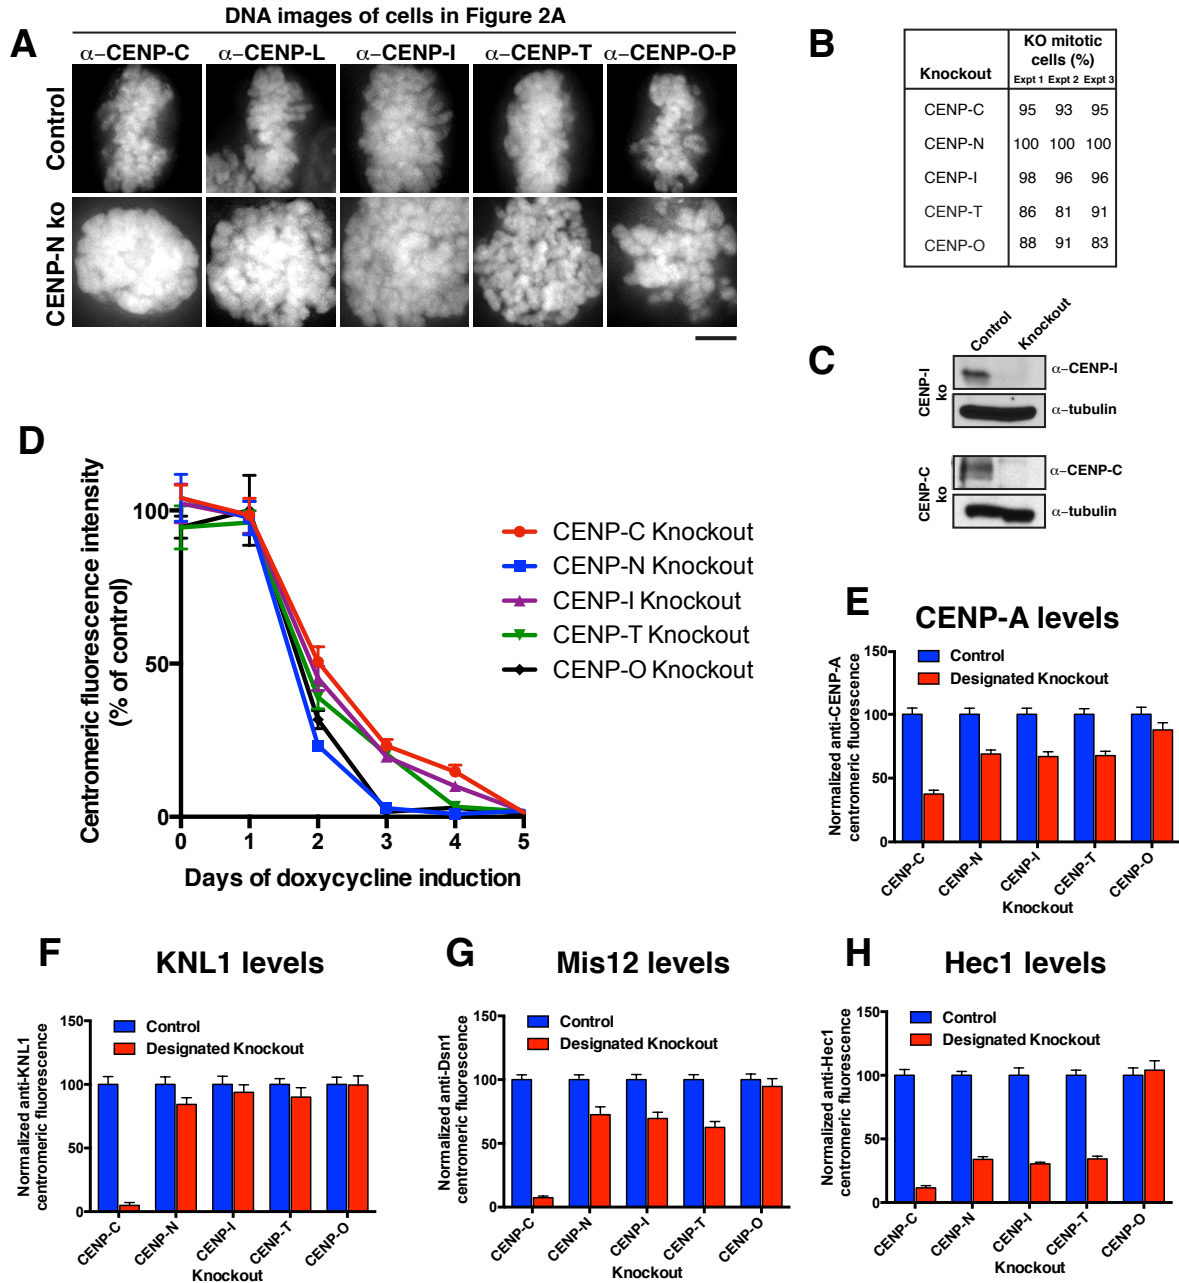

**Figure S2. Functional relationships between kinetochore proteins.** Related to Figure 2. A) Corresponding images of the DNA for the cells shown in Fig. 2A. B) Quantification of the proportion of mitotic cells in the population showing robust elimination of the sub-complex targeted by the knockout after 3 days of Cas9 induction from three independent experiments. We assessed the penetrance of the knockouts among mitotic cells, as these cells were tested for our quantitative immunofluorescence analysis. However, we note that mitotic cells are enriched in the knockouts over the interphase population due to the mitotic delay induced by most of the knockouts. C) Western blot analysis showing the absence of CENP-C and CENP-I in mitotic cells following induction of their respective knockouts for 5 days. D) Quantification of levels of the proteins corresponding to the genes targeted by the knockout over five days

following Cas9 induction (i.e. CENP-C knockout stained for  $\alpha$ -CENP-C, etc. For the CENP-N knockout,  $\alpha$ -CENP-L levels were analyzed). The fluorescence intensity of each antibody at centromeres was analyzed by quantitative immunofluorescence as in Fig. 2 and as described in the Experimental Procedures. Points represent the mean centromeric fluorescent intensity of a given antibody in the knockout as percentage of the fluorescent intensity of the antibody in control cells. Error bars represent s.e.m, n = 20 cells per condition per antibody per knockout per time point. E-H) Mean centromeric fluorescence intensity of anti-CENP-A (E), anti-KNL1 (F), anti-Dsn1 (G) or anti-Hec1 (H) in mitotic cells following induction of the indicated knockouts for five days, normalized to cells in which spCas9 is not induced. n = 20 cells per condition per antibody per knockout, error bars represent s.e.m. Note that these data are represented orthogonally to the data in Figure 2. In Fig. 2, each graph depicts the levels of all CCAN components in a single knockout. Here, each graph depicts the levels of a single component in all of the knockouts.

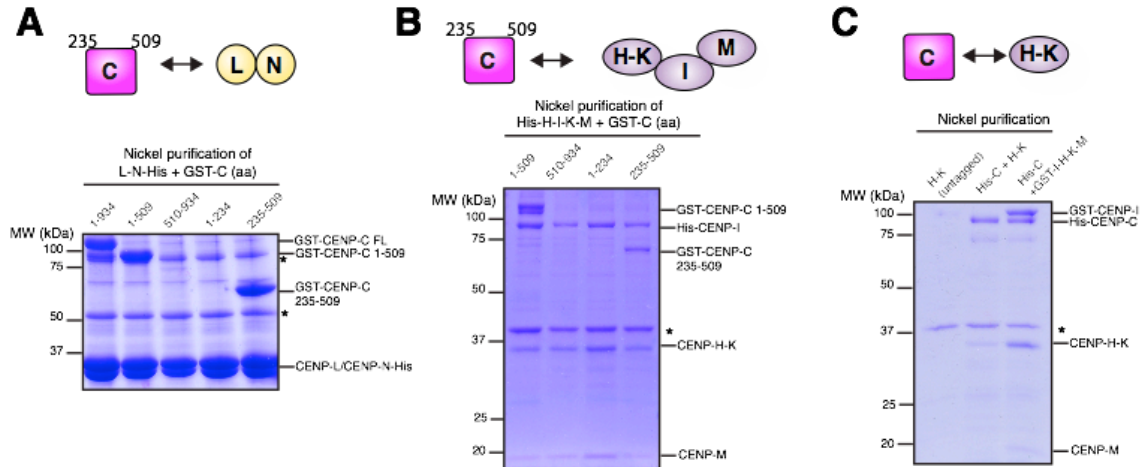

**Figure S3. Interactions of CENP-C, CENP-L-N and CENP-H-I-K-M.** Related to Figure 3. A) SDS-PAGE gel showing co-purification of fragments of GST-CENP-C with CENP-L-N-His. B) SDS-PAGE gel showing co-purification of fragments of GST-CENP-C with His-CENP-I-H-K-M. C) SDS-PAGE gel showing Nickel purification of His-CENP-C with untagged CENP-H-K. Gels were stained with Coomassie Brilliant Blue. \* : contaminant.

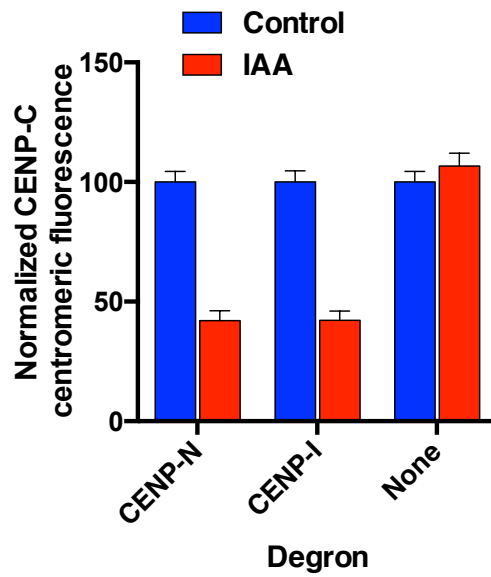

**Figure S4. Effects of auxin-hormone treatment on CENP-C levels.** Related to Figure 4. Quantification of centromeric anti-CENP-C levels in interphase cells from an asynchronous population 5 h following the addition of IAA. Parental DLD-1 cells lacking any AID-tagged alleles do not show reduction in CENP-C levels upon IAA treatment.

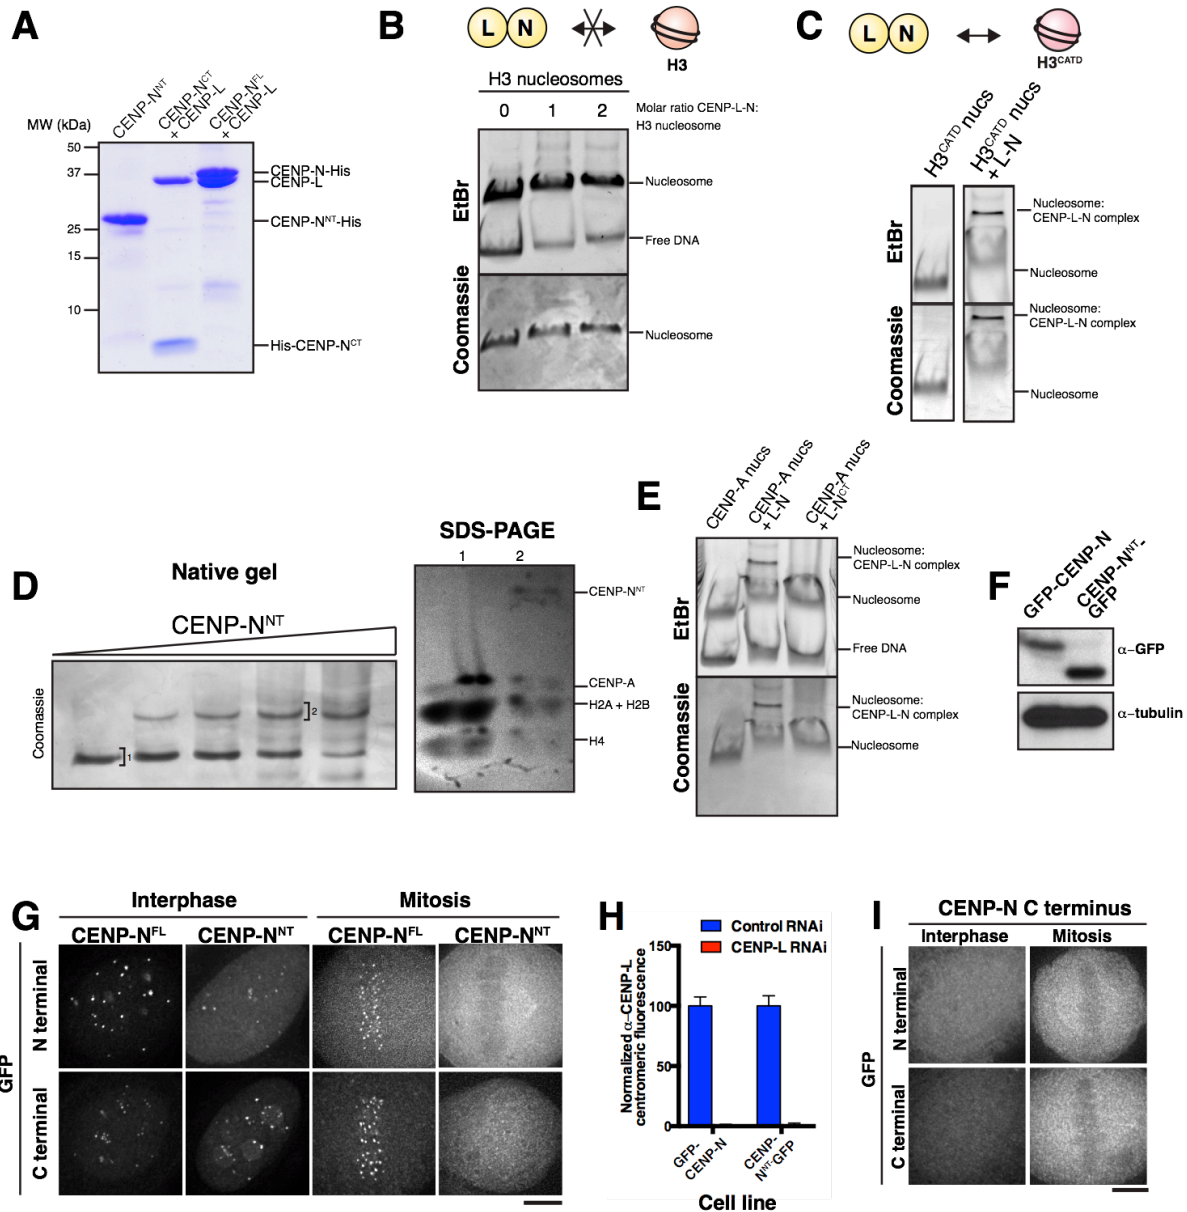

**Figure S5. Interactions of CENP-L-N at the nucleosome interface.** Related to Figure 6. A) SDS-PAGE gel showing the purification of CENP-N<sup>NT</sup>, CENP-L-N<sup>CT</sup>, and full-length CENP-L-N. B) Native gel assessing binding of 145 bp histone H3-containing nucleosomes to increasing concentrations of CENP-L-N. C) Native gel showing interactions of CENP-L-N with 145 bp H3<sup>CATD</sup> chimeric nucleosomes. D) 2-dimensional gel analysis of binding of CENP-N<sup>NT</sup> to CENP-A nucleosomes. Left: native gel of CENP-A nucleosomes with increasing amounts of CENP-N<sup>NT</sup>. The bands marked 1 and 2 were excised and run on an SDS-PAGE gel (right) to confirm the species (CENP-A nucleosomes and/or CENP-N<sup>NT</sup>) in the native gel band. E) Native gel showing failure of CENP-L-N<sup>CT</sup> to bind to CENP-A nucleosomes. F) Western blot testing levels of the GFP-CENP-N and CENP-N<sup>NT</sup>-GFP transgenes in stable cell lines used in Fig. 6D and E. G) Immunofluorescence images showing interphase and mitotic localization of transiently transfected CENP-N constructs tagged with GFP at the N- or C-terminus.

Images are not scaled equivalently, but are scaled to show the full range of data. CENP-N<sup>NT</sup> does not localize to kinetochores when tagged N-terminally, and localizes very weakly to kinetochores and diffusely to bulk chromatin when tagged C-terminally. This localization is more apparent in live cells, as shown in Fig. 6D. H) Mean centromeric fluorescence intensity of  $\alpha$ -CENP-L in cells expressing GFP-CENP-N or CENP-N<sup>NT</sup>-GFP, depleted for CENP-L by RNAi. Error bars represent s.e.m, n = 20 cells per condition. I) Immunofluorescence images of cells in interphase and mitosis following transient transfection of CENP-N<sup>CT</sup> tagged with GFP at the N- or C-terminus. Gels were stained with Ethidium Bromide (EtBr) and Coomassie Brilliant Blue as indicated. Scale bars: 5  $\mu$ m.

**Table S1. Cell lines used in this study.** Related to Experimental Procedures.

| <b>Name</b> | <b>Description of transgene</b>        | <b>Expression</b> | <b>Background</b> | <b>Source</b>                         |
|-------------|----------------------------------------|-------------------|-------------------|---------------------------------------|
| HeLa        | -                                      |                   |                   | Cheeseman lab                         |
| U2OS-lacO   | lacO array                             |                   | U2OS              | Susan Janicki (Janicki et al., 2004)  |
| DLD-TIR1    | os-TIR1-9x myc                         | Constitutive      | DLD-1             | Andrew Holland (Holland et al., 2012) |
| cTT20       | tetOn-Cas9                             | Inducible         | HeLa              | This study                            |
| cKM149      | CENP-I-AID-EGFP                        | Endogenous        | DLD-1-TIR1        | This study                            |
| cKM153      | CENP-C knockout                        | Inducible         | cTT20             | This study                            |
| cKM154      | CENP-N knockout                        | Inducible         | cTT20             | This study                            |
| cKM157      | CENP-I knockout                        | Inducible         | cTT20             | This study                            |
| cKM202      | CENP-N-AID-EGFP                        | Endogenous        | DLD-1-TIR1        | This study                            |
| cKM207      | CENP-T knockout                        | Inducible         | cTT20             | This study                            |
| cKM209      | CENP-O knockout                        | Inducible         | cTT20             | This study                            |
| cKM204      | GFP-CENP-N<br>CRISPR resistant         | Constitutive      | cKM154            | This study                            |
| cKM227      | GFP-CENP-N (1-240)<br>CRISPR resistant | Constitutive      | cKM154            | This study                            |
| cKM230      | GFP-CENP-N (1-240)<br>CRISPR resistant | Constitutive      | cKM153            | This study                            |



**Table S2. Antibodies used in this study.** Related to Experimental Procedures.

| <b>Antigen</b>            | <b>Antibody</b>                        | <b>Source</b>                          |
|---------------------------|----------------------------------------|----------------------------------------|
| Tubulin                   | Mouse anti-tubulin (DM1 $\alpha$ )     | Sigma                                  |
| Human centromere proteins | Human anti-centromere antibodies (ACA) | Antibodies Inc.                        |
| CENP-A                    | Mouse anti-CENP-A (3-19)               | Abcam                                  |
| CENP-C                    | Rabbit anti-CENP-C N-terminus          | Cheeseman lab (Gascoigne et al., 2011) |
| CENP-L                    | Rabbit anti-CENP-L                     | This study                             |
| CENP-T                    | Rabbit anti-CENP-T                     | Cheeseman lab (Gascoigne et al., 2011) |
| CENP-I (IF)               | Rabbit anti-CENP-I                     | Tim Yen (Liu et al., 2006)             |
| CENP-I (Western)          | Rabbit anti-CENP-I                     | Abcam                                  |
| CENP-K                    | Rabbit anti-CENP-K                     | This study                             |
| CENP-O-P                  | Rabbit anti-CENP-O and CENP-P          | This study                             |
| Hec1                      | Mouse anti-Hec1 [9G3]                  | Abcam                                  |
| KNL1                      | Rabbit anti-KNL1                       | Cheeseman lab (Cheeseman et al., 2008) |
| Dsn1                      | Rabbit anti-Dsn1                       | Cheeseman lab (Kline et al., 2006)     |
| GFP                       | Rabbit anti-GFP                        | Cheeseman lab                          |
| Tubulin                   | Mouse anti-tubulin (Dm1 $\alpha$ )     | Sigma                                  |

**Table S3. Oligonucleotides used in this study.** Related to Experimental Procedures.

| Purpose                               | Sequence (5'-3')                                                                               |
|---------------------------------------|------------------------------------------------------------------------------------------------|
| CENP-C knockout                       | <u>CACCGAGAGCACTGCACTCCTTCA</u><br><u>AAACTGAAGGAGTGCAGTGCTCTC</u>                             |
| CENP-I knockout                       | <u>CACCGAGAACGTCCAGGCACAAAAC</u><br><u>AAACGTTTTGTGCCTGGACGTTCTC</u>                           |
| CENP-N knockout                       | <u>CACCGCCAGTACAAACCTACCTACG</u><br><u>AAACCGTAGGTAGGTTTGTACTGGC</u>                           |
| CENP-T knockout                       | <u>CACCGCAGCGGACCCGCGCACCCCG</u><br><u>AAACCGGGGTGCGCGGGTCCGCTGC</u>                           |
| CENP-O knockout                       | <u>CACCGTTTACGGGATCTGCTCACT</u><br><u>AAACAGTGAGCAGATCCCGTAAAC</u>                             |
| CENP-I C-terminal tag sgRNA           | <u>CACCGTCCTCAAGGAGTACTCAGAC</u><br><u>AAACGTCTGAGTACTCCTTGAGGAC</u>                           |
| CENP-N C-terminal tag sgRNA           | <u>CACCGCCTGCTAACTGTAGCCGTTG</u><br><u>AAACCAACGGCTACAGTTAGCAGGC</u>                           |
| CENP-I C-terminal tag 5' homology arm | GCGCGGGGCCCCATTCCAGTGACTTTAATGTGAATTTA<br>GCGCGGTTCGACATATTGATTGTTGCAGTTTATGCC                 |
| CENP-I C-terminal tag 3' homology arm | GCGCGGGATCCATGAATGTTGACATAAACTGAACAC<br>GCGCGCCGCGGTTCTGAAAGTAAAATTTAGTTAGTTA<br>TTTAGT        |
| CENP-N C-terminal tag 5' homology arm | GCGCGGGGCCCGGCACTGTGCATGCTGGCATT<br>GCGCGTCGACtttatctctaattttaaaataattcattctctgttggg           |
| CENP-N C-terminal tag 3' homology arm | Synthesized by Genewiz, bookended by the following:<br>GACGTGCGTGGTTTCTT<br>CTGCACCACCATGCCAGC |

**Table S4. Bacmids used in this study.** Related to Experimental Procedures.

| <b>Name</b> | <b>Description of bacmid</b>                                                                            |
|-------------|---------------------------------------------------------------------------------------------------------|
| pKM394      | CENP-L; CENP-N-His                                                                                      |
| pKM377      | CENP-H; CENP-K; CENP-M; His-CENP-I                                                                      |
| pKM376      | CENP-H; CENP-K; CENP-M; GST-CENP-I                                                                      |
| pKM197      | His-CENP-C                                                                                              |
| pKM568      | GST-CENP-C                                                                                              |
| pKM672      | GST-CENP-C 1-509                                                                                        |
| pKM673      | GST-CENP-C 510-934                                                                                      |
| pKM691      | GST-CENP-C 1-234                                                                                        |
| pKM692      | GST-CENP-C 235-509                                                                                      |
| pKM498      | His-CENP-T; CENP-W                                                                                      |
| pKM410      | GST-CENP-T; CENP-W                                                                                      |
| pKM652      | His-CENP-T; CENP-W; CENP-S; GST-CENP-X                                                                  |
| pSAF60      | CENP-H; CENP-K (untagged)                                                                               |
| pDK580      | CENP-L; His-CENP-N                                                                                      |
| pDK611      | CENP-L; His-CENP-N 241-339                                                                              |
| pKM634      | CENP-I; CENP-H; CENP-K; CENP-M (all untagged)                                                           |
| pKM499      | His-CENP-U; CENP-O; CENP-P; CENP-Q                                                                      |
| pKM610      | CENP-R (untagged)                                                                                       |
| pKM744      | His-CENP-T; CENP-W <sup>DNA binding mutant</sup> (R19A, K23A, R24A, R34A, R87A; (Nishino et al., 2012). |

**Table S5. Buffers used in this study.** Related to Experimental Procedures.

| <b>Name</b>            | <b>Contents</b>                                                              |
|------------------------|------------------------------------------------------------------------------|
| His lysis buffer       | 50 mM NaPi pH 8.0<br>300 mM NaCl<br>10 mM imidazole pH 8.0<br>0.1 % Tween-20 |
| His wash buffer 300    | 50 mM NaPi pH 8.0<br>300 mM NaCl<br>40 mM imidazole pH 8.0<br>0.1 % Tween-20 |
| His wash buffer 500    | 50 mM NaPi pH 8.0<br>500 mM NaCl<br>40 mM imidazole pH 8.0<br>0.1 % Tween-20 |
| His elution buffer 300 | 50 mM NaPi pH 8.0<br>300 mM NaCl<br>250 mM imidazole pH 8.0                  |
| His elution buffer 500 | 50 mM NaPi pH 8.0<br>500 mM NaCl<br>250 mM imidazole pH 8.0                  |
| GST wash buffer 250    | 50 mM NaPi pH 8.0<br>250 mM NaCl<br>0.1 % Tween-20                           |
| GST wash buffer 500    | 50 mM NaPi pH 8.0<br>500 mM NaCl<br>0.1 % Tween-20                           |
| GST elution buffer     | 50 mM Tris pH 8.0<br>10 mM reduced glutathione<br>75 mM KCl                  |

## **SUPPLEMENTAL EXPERIMENTAL PROCEDURES**

### **Quantification of centromeric fluorescence intensity**

Quantification of fluorescence intensity was conducted on unprocessed images using Metamorph (Molecular Devices). Cells in either prometaphase or metaphase (or with chromosome alignment defects, but condensed chromosomes) were quantified. A region-of-interest of fixed size was placed over each kinetochore (as defined by CENP-A staining) and the integrated antibody fluorescence intensity of each region-of-interest was measured and corrected for local background. The mean intensity for the visible kinetochores of a given cell was then calculated. The procedure was repeated for each cell.

### **Generation of the AID-EGFP repair template**

To generate the repair plasmid for the auxin degron-tagged alleles, the AID-EGFP sequence from pCDNA5-AID-EGFP was amplified and inserted in place of eYFP in the donor plasmid described previously (McKinley and Cheeseman, 2014). Briefly, this plasmid contains a 9-residue linker (as in pCDNA5-AID-EGFP), the AID-EGFP sequence, and the neomycin resistance gene under control of the PGK promoter. For each target, a DNA sequence of ~1 kb up to, but not including, the stop codon of the gene of interest (the 5' homology arm) was amplified from HeLa genomic DNA by PCR using the oligonucleotide sequences in Table S3 and cloned upstream and in frame with the AID-EGFP sequence. A DNA sequence of ~1 kb immediately following the stop codon of the gene of interest (the 3' homology arm) was then amplified and cloned downstream of the neomycin resistance gene. To prevent cutting of the EGFP-AID-

tagged allele by SpCas9, the repair plasmid was then mutated to disrupt the PAM site in the 3' homology arm.

### **Protein purification**

The buffers used for protein purification are listed in Table S5. All insect cell pellets were drop-frozen in His lysis buffer in liquid nitrogen and thawed in His lysis buffer with 1 mini-EDTA-free protease inhibitor tablet (Roche) and PMSF. Lysates were sonicated and centrifuged at 40,000 x g for 30 mins and the cleared supernatant bound to Ni-agarose (Qiagen) or glutathione-agarose (Sigma) for 1 h, washed three times in His or GST wash buffer and eluted in His or GST elution buffer. For co-purification of insect cell complexes with CENP-N<sup>NT</sup>-His from bacteria, bacterial pellets were frozen in His lysis buffer at -80 ° C, thawed and lysed using 1 mg/ml lysozyme and centrifuged at 40,000 x g for 30 mins. The insect and bacterial supernatants were then combined in the presence of Ni-NTA agarose beads, washed three times and eluted as for complexes co-expressed in insect cells (above). All complexes co-expressed on a single bacmid were purified in 500 mM NaCl buffers. For co-infections, the following buffers were used: CENP-C/CENP-L-N complexes and CENP-L-N/CENP-H-I-K-M complexes were purified in 500 mM NaCl buffers. All other co-purifications or tests of interactions were performed in 300 mM NaCl buffers for the Nickel prep, and 250 mM NaCl buffers for the GST prep.

## SUPPLEMENTAL REFERENCES

- Cheeseman, I.M., Hori, T., Fukagawa, T., and Desai, A. (2008). KNL1 and the CENP-H/I/K complex coordinately direct kinetochore assembly in vertebrates. *Mol Biol Cell* **19**, 587-594.
- Gascoigne, K.E., Takeuchi, K., Suzuki, A., Hori, T., Fukagawa, T., and Cheeseman, I.M. (2011). Induced ectopic kinetochore assembly bypasses the requirement for CENP-A nucleosomes. *Cell* **145**, 410-422.
- Holland, A.J., Fachinetti, D., Han, J.S., and Cleveland, D.W. (2012). Inducible, reversible system for the rapid and complete degradation of proteins in mammalian cells. *Proc Natl Acad Sci U S A* **109**, E3350-3357.
- Janicki, S.M., Tsukamoto, T., Salghetti, S.E., Tansey, W.P., Sachidanandam, R., Prasanth, K.V., Ried, T., Shav-Tal, Y., Bertrand, E., Singer, R.H., *et al.* (2004). From silencing to gene expression: real-time analysis in single cells. *Cell* **116**, 683-698.
- Kline, S.L., Cheeseman, I.M., Hori, T., Fukagawa, T., and Desai, A. (2006). The human Mis12 complex is required for kinetochore assembly and proper chromosome segregation. *J Cell Biol* **173**, 9-17.
- Liu, S.T., Rattner, J.B., Jablonski, S.A., and Yen, T.J. (2006). Mapping the assembly pathways that specify formation of the trilaminar kinetochore plates in human cells. *J Cell Biol* **175**, 41-53.
- McKinley, K.L., and Cheeseman, I.M. (2014). Polo-like kinase 1 licenses CENP-A deposition at centromeres. *Cell* **158**, 397-411.
- Nishino, T., Takeuchi, K., Gascoigne, K.E., Suzuki, A., Hori, T., Oyama, T., Morikawa, K., Cheeseman, I.M., and Fukagawa, T. (2012). CENP-T-W-S-X forms a unique centromeric chromatin structure with a histone-like fold. *Cell* **148**, 487-501.
